# Supplementary material for: Plasma Lipids Profile in the Prediction of Non-Alcoholic Steatohepatitis in Adults: A Case-Control Study
Source: MDPI journal article supplement (doi:10.3390/ijms241612717), 2023-08-12
Supplement: s1 [file s1]

## Supplementary material

*Supplementary Table S1. Abbreviations of the plasma lipids calculated*

| Plasma lipid Name                                                   | Abbreviation | Category           |
|---------------------------------------------------------------------|--------------|--------------------|
| C12:0 $\mu\text{mol/L}$                                             | FA 12:0      | Fatty acids        |
| C14:0 $\mu\text{mol/L}$                                             | FA 14:0      | Fatty acids        |
| C15:0 $\mu\text{mol/L}$                                             | FA 15:0      | Fatty acids        |
| C16:0 $\mu\text{mol/L}$                                             | FA 16:0      | Fatty acids        |
| C17:0 $\mu\text{mol/L}$                                             | FA 17:0      | Fatty acids        |
| C18:0 $\mu\text{mol/L}$                                             | FA 18:0      | Fatty acids        |
| C20:0 $\mu\text{mol/L}$                                             | FA 20:0      | Fatty acids        |
| C22:0 $\mu\text{mol/L}$                                             | FA 22:0      | Fatty acids        |
| C24:0 $\mu\text{mol/L}$                                             | FA 24:0      | Fatty acids        |
| C16:1 $\mu\text{mol/L}$                                             | FA 16:1      | Fatty acids        |
| C18:1 $\mu\text{mol/L}$                                             | FA 18:1      | Fatty acids        |
| C20:1 $\mu\text{mol/L}$                                             | FA 20:1      | Fatty acids        |
| C24:1 $\mu\text{mol/L}$                                             | FA 24:1      | Fatty acids        |
| C18:2 (Linoleic acid=LA) $\mu\text{mol/L}$                          | FA 18:2      | Fatty acids        |
| C18:3 n3 (alfa linoleic acid, ALA) $\mu\text{mol/L}$                | FA 18:3 n3   | Fatty acids        |
| C18:3 n6 (Gamma linoleic acid, GLA) $\mu\text{mol/L}$               | FA 18:3 n6   | Fatty acids        |
| C20:3 n6 (Dihomo- $\gamma$ -linolenic acid, DGLA) $\mu\text{mol/L}$ | FA 20:3 n6   | Fatty acids        |
| C20:4 n6 (Arachidonic acid, AA) $\mu\text{mol/L}$                   | FA 20:4 n6   | Fatty acids        |
| C20:5 n3 (Eicosapentaenoic acid, EPA) $\mu\text{mol/L}$             | FA 20:5 n3   | Fatty acids        |
| C22:6 n3 (Docosahexaenoic acid, DHA) $\mu\text{mol/L}$              | FA 22:6 n3   | Fatty acids        |
| Total saturated fatty acids mmol/L                                  | SFA          | Sum of fatty acids |

|                                                                 |                             |                    |
|-----------------------------------------------------------------|-----------------------------|--------------------|
| Total monounsaturated fatty acids mmol/L                        | MUFA                        | Sum of fatty acids |
| Total polyunsaturated fatty acids mmol/L                        | PUFA                        | Sum of fatty acids |
| Total n3 fatty acids mmol/L                                     | Total n3 FA                 | Sum of fatty acids |
| Total n6 fatty acids mmol/L                                     | Total n6 FA                 | Sum of fatty acids |
| Total fatty acids mmol/L                                        | TFA                         | Sum of fatty acids |
| LA/GLA                                                          | LA/GLA                      | Fatty acids ratio  |
| EPA/DGLA                                                        | EPA/DGLA                    | Fatty acids ratio  |
| AA/EPA                                                          | AA/EPA                      | Fatty acids ratio  |
| D5-desaturase index (C18:2/C20:4)                               | $\Delta$ 5-desaturase index | Fatty acids ratio  |
| D6-desaturase index (C18:2/C18:3)                               | $\Delta$ 6-desaturase index | Fatty acids ratio  |
| D9-desaturase index (C16:1/C16:0)                               | $\Delta$ 9-desaturase index | Fatty acids ratio  |
| DNL index (C16:0/C18:2)                                         | DNL index                   | Fatty acids ratio  |
| Elongation index (C18:0/C16:0)                                  | Elongation index            | Fatty acids ratio  |
| Essential fatty acids (C18:2+C18:3) $\mu$ mol/L                 | EFA                         | Sum of fatty acids |
| Non-essential fatty acids (C16:0+C16:1+C18:0+C18:1) $\mu$ mol/L | NEFA                        | Sum of fatty acids |
| Cer(d18:1/16:0) $\mu$ mol/L                                     | Cer(d18:1/16:0)             | Ceramides          |
| Cer(d18:1/18:0) $\mu$ mol/L                                     | Cer(d18:1/18:0)             | Ceramides          |
| Cer(d18:1/24:0) $\mu$ mol/L                                     | Cer(d18:1/24:0)             | Ceramides          |
| Cer(d18:1/24:1) $\mu$ mol/L                                     | Cer(d18:1/24:1)             | Ceramides          |
| Ratio Cer(d18:1/16:0)/ Cer(d18:1/24:0)                          | Ratio Cer(16:0/24:0)        | Ceramides ratio    |
| Ratio Cer(d18:1/18:0)/ Cer(d18:1/24:0)                          | Ratio Cer(18:0/24:0)        | Ceramides ratio    |
| Ratio Cer(d18:1/24:1)/ Cer(d18:1/24:0)                          | Ratio Cer(18:1/24:0)        | Ceramides ratio    |
| Acetylcarnitine C2 $\mu$ mol/L                                  | CAR 2:0                     | Acylcarnitines     |
| Propionylcarnitine C3 $\mu$ mol/L                               | CAR 3:0                     | Acylcarnitines     |
| Butyrylcarnitine C4 $\mu$ mol/L                                 | CAR 4:0                     | Acylcarnitines     |
| Valerylcarnitine C5 $\mu$ mol/L                                 | CAR 5:0                     | Acylcarnitines     |
| Hexanoylcarnitine C6 $\mu$ mol/L                                | CAR 6:0                     | Acylcarnitines     |

|                                 |          |                |
|---------------------------------|----------|----------------|
| Octanoylcarnitine C8 µmol/L     | CAR 8:0  | Acylcarnitines |
| Decanoylcarnitine C10 µmol/L    | CAR 10:0 | Acylcarnitines |
| Lauroylcarnitine C12 µmol/L     | CAR 12:0 | Acylcarnitines |
| Myristoylcarnitine C14 µmol/L   | CAR 14:0 | Acylcarnitines |
| Palmitoylcarnitine C16 µmol/L   | CAR 16:0 | Acylcarnitines |
| Linoleoylcarnitine C18:2 µmol/L | CAR 18:2 | Acylcarnitines |
| Oleoylecarnitine C18:1 µmol/L   | CAR 18:1 | Acylcarnitines |
| Stearoylcarnitine C18 µmol/L    | CAR 18:0 | Acylcarnitines |

*Supplementary Table S2. Detailed plasma lipid composition and comparison between the 3 study groups*

|                           | Study groups     |                  |                  |                  |                              |                              |                           |
|---------------------------|------------------|------------------|------------------|------------------|------------------------------|------------------------------|---------------------------|
|                           | Total            | Controls         | NAFL             | NASH             | NAFL vs Control <sup>§</sup> | NASH vs Control <sup>§</sup> | NASH vs NAFL <sup>§</sup> |
| N                         | 37               | 15               | 10               | 12               |                              |                              |                           |
| Fatty acids and analogues |                  |                  |                  |                  |                              |                              |                           |
| FA 12:0                   | 73.3 (71.4-75.2) | 71.7 (71.1-72.5) | 72.5 (70.6-74.9) | 75.2 (73.8-85.9) | 0.4540                       | 0.0002**                     | 0.0602                    |
| FA 14:0                   | 156 (146-170)    | 148 (142-159)    | 149 (142-164)    | 176 (161-209)    | 0.8029                       | 0.0014**                     | 0.0134*                   |
| FA 15:0                   | 23.9 (22.7-30.4) | 23.5 (22.1-28.7) | 23.1 (21.0-25.9) | 26.9 (25.1-34.9) | 0.6774                       | 0.0429*                      | 0.0272*                   |
| FA 16:0                   | 1715 (1530-2240) | 1536 (1492-1785) | 1694 (1609-1836) | 2280 (1687-2943) | 0.3899                       | 0.0137*                      | 0.0927                    |
| FA 17:0                   | 28.5 (25.4-35.8) | 28.5 (25.1-34.1) | 25.7 (24.6-32.3) | 32.9 (28.0-41.5) | 0.5603                       | 0.0673                       | 0.0134*                   |
| FA 18:0                   | 650 (577-727)    | 650 (570-683)    | 600 (564-673)    | 753 (601-804)    | 0.7184                       | 0.0429*                      | 0.0229*                   |
| FA 20:0                   | 56.5 (55.7-57.5) | 56.7 (55.8-57.3) | 56.3 (55.4-56.9) | 56.6 (56.2-58.3) | 0.56                         | 0.51                         | 0.1764                    |
| FA 22:0                   | 84.0 (82.1-85.8) | 84.6 (82.2-86.4) | 84.2 (82.1-84.8) | 83.6 (82.5-86.8) | 0.4881                       | 1                            | 0.575                     |

|                    |                  |                  |                  |                   |        |          |          |
|--------------------|------------------|------------------|------------------|-------------------|--------|----------|----------|
| <i>FA 24:0</i>     | 50.4 (49.7-51.2) | 50.5 (49.8-51.3) | 50.3 (49.4-50.8) | 50.2 (49.7-51.3)  | 0.4887 | 0.981    | 0.454    |
| <i>FA 16:1</i>     | 144 (129-183)    | 133 (120-143)    | 143 (128-173)    | 227 (153-333)     | 0.4212 | 0.0058** | 0.0518   |
| <i>FA 18:1</i>     | 1332 (1134-1715) | 1243 (1015-1393) | 1315 (1149-1512) | 1714 (1304-2750)  | 0.4212 | 0.0137*  | 0.1062   |
| <i>FA 20:1</i>     | 9.42 (8.82-9.99) | 9.06 (8.41-9.55) | 9.03 (8.66-10.3) | 9.91 (9.41-11.2)  | 0.5603 | 0.0058** | 0.0806   |
| <i>FA 24:1</i>     | 71.4 (69.8-75.9) | 75.7 (70.3-78.7) | 71.2 (69.9-73.5) | 70.8 (69.1-72.9)  | 0.1416 | 0.102    | 0.8175   |
| <i>FA 20:5 n3</i>  | 89.2 (84.9-93.8) | 91.1 (84.6-96.7) | 87.4 (84.6-89.9) | 91.5 (86.3-98.7)  | 0.1572 | 0.643    | 0.1213   |
| <i>FA 22:6 n3</i>  | 160 (148-172)    | 160 (148-172)    | 159 (145-163)    | 173 (154-189)     | 0.4212 | 0.2319   | 0.1062   |
| <i>FA 18:2</i>     | 1521 (1374-1774) | 1518 (1412-1671) | 1326 (1276-1628) | 1698 (1513-2379)  | 0.0907 | 0.1021   | 0.0161*  |
| <i>FA 18:3 n3</i>  | 65.9 (64.9-69.9) | 65.2 (63.7-67.1) | 65.2 (64.9-65.5) | 70.8 (66.9-81.4)  | 0.7603 | 0.0043** | 0.0062** |
| <i>FA 18:3 n6</i>  | 79.8 (73.8-84.1) | 77.6 (74.1-81.9) | 78.2 (74.4-82.2) | 86.3 (73.8-92.3)  | 0.9337 | 0.1796   | 0.1765   |
| <i>FA 20:3 n6</i>  | 205 (196-217)    | 199 (192-207)    | 205 (195-214)    | 214 (205-231)     | 0.5982 | 0.0381*  | 0.1985   |
| <i>FA 20:4 n6</i>  | 528 (502-552)    | 528 (501-550)    | 527 (507-549)    | 535 (500-557)     | 0.9337 | 0.9029   | 0.9212   |
| <i>SFA</i>         | 2.80 (2.63-3.49) | 2.64 (2.54-2.94) | 2.72 (2.64-3.03) | 3.55 (2.76-4.28)  | 0.4540 | 0.0104*  | 0.0602   |
| <i>MUFA</i>        | 1.53 (1.37-1.99) | 1.46 (1.24-1.62) | 1.53 (1.39-1.74) | 2.08 (1.5-3.23)   | 0.4212 | 0.0137*  | 0.1062   |
| <i>PUFA</i>        | 2.70 (2.45-2.94) | 2.7 (2.49-2.84)  | 2.44 (2.38-2.8)  | 2.87 (2.64-3.58)  | 0.2555 | 0.1128   | 0.0134*  |
| <i>Total n3 FA</i> | 0.32 (0.31-0.34) | 0.32 (0.3-0.33)  | 0.31 (0.29-0.32) | 0.35 (0.31-0.36)  | 0.4540 | 0.1500   | 0.0378*  |
| <i>Total n6 FA</i> | 0.81 (0.78-0.86) | 0.81 (0.77-0.84) | 0.81 (0.79-0.85) | 0.84 (0.78-0.9)   | 0.8029 | 0.2723   | 0.3734   |
| <i>TFA</i>         | 6.85 (6.5-8.52)  | 6.85 (6.14-7.40) | 6.73 (6.44-7.4)  | 8.76 (6.82-11.09) | 0.9337 | 0.0264*  | 0.0518   |
| <i>LA/GLA</i>      | 20.0 (17.9-21.9) | 19.6 (18.8-20.7) | 17.8 (15.6-20.0) | 22.0 (19.9-26.2)  | 0.0806 | 0.1021   | 0.0321*  |
| <i>EPA/DGLA</i>    | 0.44 (0.41-0.47) | 0.45 (0.43-0.5)  | 0.42 (0.41-0.44) | 0.41 (0.39-0.48)  | 0.1017 | 0.15     | 1        |

|                              |                  |                  |                  |                  |          |          |          |
|------------------------------|------------------|------------------|------------------|------------------|----------|----------|----------|
| <i>AA/EPA</i>                | 5.86 (5.63-6.27) | 5.74 (5.24-6.18) | 6.15 (5.84-6.39) | 5.79 (5.62-6.17) | 0.0806   | 0.7511   | 0.1765   |
| <i>Δ5-desaturase index</i>   | 2.95 (2.63-3.31) | 2.88 (2.79-3.12) | 2.61 (2.4-2.9)   | 3.35 (3.07-4.33) | 0.0429*  | 0.0264*  | 0.0062** |
| <i>Δ6-desaturase index</i>   | 10.4 (9.74-11.9) | 10.4 (9.93-11.4) | 9.56 (8.64-10.8) | 11.1 (10.4-14.6) | 0.0631   | 0.2319   | 0.0378*  |
| <i>Δ9-desaturase index</i>   | 0.08 (0.08-0.1)  | 0.08 (0.07-0.09) | 0.09 (0.08-0.1)  | 0.1 (0.08-0.12)  | 0.1741   | 0.0832   | 0.1765   |
| <i>DNL index</i>             | 1.13 (1.04-1.27) | 1.06 (1.02-1.09) | 1.26 (1.18-1.34) | 1.16 (1.11-1.33) | 0.0017** | 0.0264*  | 0.6209   |
| <i>Elongation index</i>      | 0.36 (0.34-0.38) | 0.37 (0.36-0.4)  | 0.36 (0.32-0.38) | 0.33 (0.28-0.36) | 0.1741   | 0.0078** | 0.2766   |
| <i>EFA</i>                   | 1695 (1506-1921) | 1661 (1548-1816) | 1463 (1422-1778) | 1852 (1680-2542) | 0.0907   | 0.0923   | 0.0192*  |
| <i>NEFA</i>                  | 3832 (3469-4935) | 3620 (3202-4004) | 3830 (3484-4005) | 5028 (3620-6911) | 0.5235   | 0.0180*  | 0.1213   |
| <b><i>Ceramides</i></b>      |                  |                  |                  |                  |          |          |          |
| <i>Cer(d18:1/16:0)</i>       | 0.59 (0.44-0.65) | 0.49 (0.42-0.63) | 0.56 (0.38-0.62) | 0.7 (0.54-0.76)  | 0.8461   | 0.0232*  | 0.0378*  |
| <i>Cer(d18:1/18:0)</i>       | 0.24 (0.18-0.31) | 0.18 (0.13-0.29) | 0.23 (0.18-0.3)  | 0.29 (0.25-0.37) | 0.2917   | 0.0264*  | 0.1211   |
| <i>Cer(d18:1/24:0)</i>       | 10.7 (8.55-12.9) | 10.2 (7.75-12.9) | 10.0 (8.87-11.8) | 11.7 (9.75-13.0) | 0.7392   | 0.4067   | 0.2622   |
| <i>Cer(d18:1/24:1)</i>       | 3.49 (2.65-4.47) | 3.05 (2.67-4.5)  | 3.43 (2.65-3.67) | 3.94 (3.04-4.63) | 0.8897   | 0.2829   | 0.2225   |
| <i>Ratio Cer (16:0/24:0)</i> | 0.05 (0.04-0.06) | 0.05 (0.04-0.05) | 0.05 (0.04-0.06) | 0.06 (0.05-0.07) | 0.2917   | 0.0264   | 0.1211   |
| <i>Ratio Cer (18:0/24:0)</i> | 0.02 (0.02-0.03) | 0.02 (0.01-0.02) | 0.02 (0.02-0.03) | 0.03 (0.02-0.03) | 0.1924   | 0.0205*  | 0.3390   |
| <i>Ratio Cer (24:1/24:0)</i> | 0.35 (0.28-0.41) | 0.32 (0.24-0.42) | 0.35 (0.34-0.37) | 0.33 (0.3-0.42)  | 0.8897   | 0.2830   | 0.2225   |
| <b><i>Acylcarnitines</i></b> |                  |                  |                  |                  |          |          |          |
| <i>CAR 2:0</i>               | 12.6 (8.31-15.1) | 9.79 (8.25-16.5) | 13.6 (8.92-16.1) | 12.6 (10.5-14.8) | 0.4881   | 0.9805   | 0.5310   |



Supplementary table S3. Detailed plasma lipid composition and comparison between high and low HOMA-IR groups

|                                  | <i>Total</i>     | <i>Low HOMA-IR</i> | <i>High HOMA-IR</i> | <i>Low vs High<br/>HOMA-IR</i> <sup>§</sup> |
|----------------------------------|------------------|--------------------|---------------------|---------------------------------------------|
| <i>N</i>                         | <i>37</i>        | <i>18</i>          | <i>19</i>           |                                             |
| <i>Fatty acids and analogues</i> |                  |                    |                     |                                             |
| <i>FA 12:0</i>                   | 73.3 (71.4-75.2) | 71.6 (71.1-72.6)   | 75.1 (73.6-80.4)    | 0.0010**                                    |
| <i>FA 14:0</i>                   | 156 (146-170)    | 148 (142-156)      | 166 (156-191)       | 0.0030**                                    |
| <i>FA 15:0</i>                   | 23.9 (22.7-30.4) | 23.0 (21.4-24.0)   | 26.6 (23.9-33.1)    | 0.0217*                                     |
| <i>FA 16:0</i>                   | 1715 (1530-2240) | 1612 (1514-1718)   | 2095 (1684-2664)    | 0.0085**                                    |
| <i>FA 17:0</i>                   | 28.5 (25.4-35.8) | 25.9 (24.8-32.4)   | 33.7 (27.4-38.6)    | 0.0373*                                     |
| <i>FA 18:0</i>                   | 650 (577-727)    | 600 (564-672)      | 718 (600-779)       | 0.0200*                                     |
| <i>FA 20:0</i>                   | 56.5 (55.7-57.5) | 56.4 (55.6-57.0)   | 56.6 (56.1-57.9)    | 0.3234                                      |
| <i>FA 22:0</i>                   | 84.0 (82.1-85.8) | 84.1 (81.8-85.1)   | 84.0 (82.4-86.8)    | 0.3087                                      |
| <i>FA 24:0</i>                   | 50.4(49.7-51.2)  | 50.3 (49.6-50.9)   | 50.4 (49.8-51.4)    | 0.4566                                      |
| <i>FA 16:1</i>                   | 144 (129-183)    | 131 (119-144)      | 179 (143-274)       | 0.0033**                                    |
| <i>FA 18:1</i>                   | 1332 (1134-1715) | 1271 (1097-1384)   | 1581 (1193-2231)    | 0.0275*                                     |
| <i>FA 20:1</i>                   | 9.42 (8.82-9.99) | 9.01 (8.49-9.56)   | 9.9 (9.19-10.8)     | 0.0144*                                     |
| <i>FA 24:1</i>                   | 71.4 (69.8-75.9) | 72.2 (69.7-76.3)   | 71.3 (70.1-74.8)    | 0.8673                                      |
| <i>FA 18:2</i>                   | 1521 (1374-1774) | 1430 (1328-1617)   | 1665 (1472-2139)    | 0.0465*                                     |
| <i>FA 20:5 n3</i>                | 89.2 (84.9-93.8) | 90.7 (86.0-93.3)   | 86.9 (84.7-94.5)    | 0.3540                                      |
| <i>FA 22:6 n3</i>                | 161 (148-178)    | 159 (147-163)      | 164 (153-181)       | 0.2300                                      |
| <i>FA 18:3 n3</i>                | 65.9 (64.9-69.9) | 65.3 (64.7-66.4)   | 68.9 (65.4-75.5)    | 0.0617                                      |
| <i>FA 18:3 n6</i>                | 79.8 (73.8-84.1) | 77.2 (74.9-81.7)   | 82.6 (73.7-87.9)    | 0.3700                                      |
| <i>FA 20:3 n6</i>                | 205 (196-217)    | 199 (196-205)      | 213 (198-220)       | 0.0706                                      |
| <i>FA 20:4 n6</i>                | 528 (502-552)    | 520 (497-539)      | 547 (507-575)       | 0.1325                                      |
| <i>SFA</i>                       | 2.8 (2.63-3.49)  | 2.64 (2.57-2.85)   | 3.36 (2.76-3.98)    | 0.0065**                                    |
| <i>MUFA</i>                      | 1.53 (1.37-1.99) | 1.48 (1.29-1.6)    | 1.94 (1.44-2.57)    | 0.0235*                                     |
| <i>PUFA</i>                      | 2.7 (2.45-2.94)  | 2.56 (2.41-2.77)   | 2.86 (2.55-3.34)    | 0.0298*                                     |
| <i>TFA</i>                       | 6.85 (6.5-8.52)  | 6.7 (6.39-7.22)    | 8.42 (6.81-9.48)    | 0.0157*                                     |
| <i>LA/GLA</i>                    | 20.0 (17.9-21.9) | 18.8 (17.6-20.2)   | 20.6 (19.4-24.3)    | 0.0465*                                     |
| <i>EPA/DGLA</i>                  | 0.44 (0.41-0.47) | 0.44 (0.43-0.48)   | 0.42 (0.39-0.46)    | 0.0575                                      |
| <i>AA/EPA</i>                    | 5.86 (5.63-6.27) | 5.72 (5.45-5.92)   | 6.26 (5.79-6.41)    | 0.0157*                                     |
| <i>Δ5-desaturase index</i>       | 2.95 (2.63-3.31) | 2.8 (2.63-3.04)    | 3.09 (2.78-3.88)    | 0.0575                                      |
| <i>Δ6-desaturase index</i>       | 10.4 (9.74-11.9) | 9.93 (9.56-10.83)  | 11.2 (10.31-13.3)   | 0.0617                                      |
| <i>Δ9-desaturase index</i>       | 0.08 (0.08-0.1)  | 0.08 (0.08-0.09)   | 0.09 (0.08-0.1)     | 0.0660                                      |
| <i>DNL index</i>                 | 1.13 (1.04-1.27) | 1.07 (1.02-1.23)   | 1.17 (1.09-1.32)    | 0.0402*                                     |
| <i>Elongation index</i>          | 0.36 (0.34-0.38) | 0.37 (0.35-0.39)   | 0.34 (0.29-0.37)    | 0.0157*                                     |
| <i>EFA</i>                       | 1695 (1506-1921) | 1571 (1467-1769)   | 1813 (1614-2300)    | 0.0465*                                     |
| <i>NEFA</i>                      | 3832 (3469-4935) | 3576 (3338-3963)   | 4935 (3588-5903)    | 0.0144*                                     |
| <i>Ceramides</i>                 |                  |                    |                     |                                             |
| <i>Cer(d18:1/16:0)</i>           | 0.59 (0.44-0.65) | 0.47 (0.42-0.61)   | 0.65 (0.51-0.71)    | 0.0575                                      |
| <i>Cer(d18:1/18:0)</i>           | 0.24 (0.18-0.31) | 0.18 (0.13-0.23)   | 0.29 (0.25-0.35)    | 0.0038**                                    |
| <i>Cer(d18:1/24:0)</i>           | 10.7 (8.55-12.9) | 10.1 (8.59-12.4)   | 10.8 (8.53-13.0)    | 0.5739                                      |
| <i>Cer(d18:1/24:1)</i>           | 3.49 (2.65-4.47) | 3.06 (2.56-3.67)   | 3.72 (2.91-4.64)    | 0.1212                                      |

|                                                                                                                                                                                                                                                                               |                  |                  |                  |          |
|-------------------------------------------------------------------------------------------------------------------------------------------------------------------------------------------------------------------------------------------------------------------------------|------------------|------------------|------------------|----------|
| <i>Ratio Cer(16:0/24:0)</i>                                                                                                                                                                                                                                                   | 0.05 (0.04-0.06) | 0.05 (0.04-0.05) | 0.05 (0.05-0.06) | 0.1862   |
| <i>Ratio Cer(18:0/24:0)</i>                                                                                                                                                                                                                                                   | 0.02 (0.02-0.03) | 0.02 (0.01-0.02) | 0.03 (0.02-0.03) | 0.0040** |
| <i>Ratio Cer(24:1/24:0)</i>                                                                                                                                                                                                                                                   | 0.35 (0.28-0.41) | 0.31 (0.24-0.39) | 0.35 (0.32-0.41) | 0.2545   |
| <b>Acylcarnitines</b>                                                                                                                                                                                                                                                         |                  |                  |                  |          |
| <i>CAR 2:0</i>                                                                                                                                                                                                                                                                | 12.6 (8.31-15.1) | 9.01 (8.3-16.3)  | 13.0 (10.9-14.8) | 0.5535   |
| <i>CAR 3:0</i>                                                                                                                                                                                                                                                                | 0.57 (0.51-0.72) | 0.53 (0.5-0.6)   | 0.62 (0.56-0.78) | 0.0465*  |
| <i>CAR 4:0</i>                                                                                                                                                                                                                                                                | 0.09 (0.07-0.12) | 0.08 (0.06-0.12) | 0.1 (0.08-0.12)  | 0.1176   |
| <i>CAR 5:0</i>                                                                                                                                                                                                                                                                | 0.06 (0.05-0.07) | 0.05 (0.05-0.07) | 0.07 (0.06-0.09) | 0.0235*  |
| <i>CAR 6:0</i>                                                                                                                                                                                                                                                                | 0.06 (0.04-0.08) | 0.06 (0.04-0.08) | 0.07 (0.05-0.09) | 0.4846   |
| <i>CAR 8:0</i>                                                                                                                                                                                                                                                                | 0.15 (0.1-0.19)  | 0.16 (0.12-0.19) | 0.13 (0.09-0.2)  | 0.7497   |
| <i>CAR 10:0</i>                                                                                                                                                                                                                                                               | 0.26 (0.14-0.33) | 0.27 (0.2-0.33)  | 0.2 (0.14-0.32)  | 0.3234   |
| <i>CAR 12:0</i>                                                                                                                                                                                                                                                               | 0.04 (0.03-0.06) | 0.04 (0.03-0.06) | 0.04 (0.03-0.07) | 0.9153   |
| <i>CAR 14:0</i>                                                                                                                                                                                                                                                               | 0.04 (0.03-0.05) | 0.04 (0.03-0.04) | 0.04 (0.03-0.05) | 0.4474   |
| <i>CAR 16:0</i>                                                                                                                                                                                                                                                               | 0.1 (0.09-0.14)  | 0.1 (0.08-0.12)  | 0.1 (0.09-0.14)  | 1.0000   |
| <i>CAR 18:2</i>                                                                                                                                                                                                                                                               | 0.18 (0.14-0.26) | 0.19 (0.13-0.24) | 0.16 (0.15-0.26) | 0.8197   |
| <i>CAR 18:1</i>                                                                                                                                                                                                                                                               | 0.18 (0.14-0.24) | 0.19 (0.15-0.27) | 0.17 (0.14-0.23) | 0.3700   |
| <i>CAR 18:0</i>                                                                                                                                                                                                                                                               | 0.03 (0.02-0.03) | 0.03 (0.02-0.03) | 0.02 (0.02-0.03) | 0.1621   |
| - Values of the plasma lipids are presented as median (25th-75th percentile)<br>- ‡: In the comparison between the groups the <i>P</i> values were calculated using the Mann Whitney U test<br>- *: <i>p</i> value <0.05. **: <i>p</i> value <0.01. statistically significant |                  |                  |                  |          |

*Supplementary table S4. Correlation of clinical, laboratory and plasma lipid parameters with NAS and Fibrosis score*

|                        | <b>NAS score*</b> | <b>Fibrosis score*</b> |
|------------------------|-------------------|------------------------|
| <b>FA 16:1</b>         | 0,5265            | 0,2081                 |
| <b>FA 18:3 n 6</b>     | 0,3073            | 0,1755                 |
| <b>Cer(d18:1/18:0)</b> | 0,4599            | 0,2606                 |
| <b>Cer(d18:1/24:0)</b> | 0,2492            | 0,0533                 |
| <b>Cer(d18:1/24:1)</b> | 0,2739            | 0,1172                 |
| <b>AA/EPA</b>          | 0,0655            | 0,0126                 |
| <b>CAR 2:0</b>         | -0,0691           | -0,088                 |
| <b>Age</b>             | 0,0823            | 0,3084                 |
| <b>ALB</b>             | 0,0348            | -0,0676                |
| <b>ALP</b>             | 0,1769            | 0,1999                 |
| <b>ALT</b>             | 0,6929            | 0,2742                 |
| <b>AST</b>             | 0,6384            | 0,3078                 |
| <b>BMI</b>             | 0,4711            | 0,4812                 |
| <b>CAR 4:0</b>         | 0,2421            | -0,0081                |
| <b>FA 12:0</b>         | 0,3998            | 0,5277                 |
| <b>FA 14:0</b>         | 0,5105            | 0,3631                 |
| <b>FA 15:0</b>         | 0,3483            | 0,369                  |
| <b>FA 16:0</b>         | 0,5185            | 0,305                  |
| <b>FA 17:0</b>         | 0,3421            | 0,3736                 |
| <b>FA 18:0</b>         | 0,4541            | 0,2377                 |
| <b>FA 18:3 n3</b>      | 0,3992            | 0,2518                 |



|                                        |         |         |
|----------------------------------------|---------|---------|
| FA 20:0                                | 0,2227  | 0,1987  |
| FA 20:1n11                             | 0,4595  | 0,4309  |
| FA 20:3 n6                             | 0,419   | 0,0895  |
| FA 20:4 n6                             | 0,1377  | 0,0362  |
| FA 20:5 n3                             | 0,0162  | 0,0123  |
| FA 22:0                                | 0,0163  | -0,0747 |
| FA 22:6 n3                             | 0,2985  | 0,1538  |
| FA 24:0                                | 0,0023  | -0,1031 |
| FA 24:1                                | -0,3467 | -0,2893 |
| Cer(d18:1/16:0)                        | 0,3844  | 0,3283  |
| FA 18:1                                | 0,5065  | 0,3503  |
| FA 18:2                                | 0,412   | 0,2324  |
| $\Delta 5$ -desaturase index           | 0,4256  | 0,2595  |
| $\Delta 6$ -desaturase index           | 0,3588  | 0,2093  |
| $\Delta 9$ -desaturase index           | 0,282   | 0,0347  |
| CAR 10:0                               | -0,0463 | -0,0988 |
| DNL index                              | 0,4136  | 0,3352  |
| Elongation index                       | -0,5236 | -0,4253 |
| EPA/DGLA                               | -0,3451 | -0,0812 |
| EFA                                    | 0,4138  | 0,2341  |
| FBG                                    | 0,3981  | 0,5594  |
| FERRITIN                               | 0,3882  | 0,3801  |
| GGT                                    | 0,3668  | 0,5084  |
| HBA1C                                  | 0,3171  | 0,5154  |
| HDL                                    | -0,4441 | -0,347  |
| CAR 6:0                                | 0,1165  | 0,1074  |
| HOMA-IR                                | 0,6532  | 0,6312  |
| LA/GLA                                 | 0,3785  | 0,2226  |
| CAR 12:0                               | 0,1055  | -0,0184 |
| LDL                                    | -0,0172 | -0,119  |
| CAR 18:2                               | -0,0967 | -0,0258 |
| CAR 14:0                               | 0,1181  | 0,0639  |
| NEFA                                   | 0,5196  | 0,3184  |
| CAR 8:0                                | -0,0195 | -0,0599 |
| CAR 18:1                               | -0,1717 | -0,0919 |
| CAR 16:0                               | 0,0576  | 0,0207  |
| PLT(x1000)                             | -0,0922 | -0,2431 |
| CAR 3:0                                | 0,3304  | 0,3101  |
| Ratio Cer(d18:1/16:0)/ Cer(d18:1/24:0) | 0,1679  | 0,3305  |
| Ratio Cer(d18:1/18:0)/ Cer(d18:1/24:0) | 0,3441  | 0,2664  |
| Ratio Cer(d18:1/24:1)/ Cer(d18:1/24:0) | 0,0298  | 0,0705  |
| CAR 18:0                               | -0,1563 | -0,0272 |
| TFA                                    | 0,4972  | 0,2995  |
| MUFA                                   | 0,5194  | 0,3385  |
| Total n3 FA                            | 0,3388  | 0,1924  |
| Total n6 FA                            | 0,2971  | 0,0798  |
| PUFA                                   | 0,4153  | 0,2264  |

|                                                                                                    |        |        |
|----------------------------------------------------------------------------------------------------|--------|--------|
| <b>SFA</b>                                                                                         | 0,5101 | 0,3015 |
| <b>TRG</b>                                                                                         | 0,6075 | 0,3859 |
| <b>Uric acid</b>                                                                                   | 0,5162 | 0,0502 |
| <b>CAR 5:0</b>                                                                                     | 0,3476 | 0,2602 |
| <b>WC</b>                                                                                          | 0,4595 | 0,4318 |
| * Correlations are presented with Pearson's correlation coefficient (r) which ranges from -1 to +1 |        |        |

*Supplementary Table S5. The AUC values for all the plasma lipids and each pair of groups compared*

| Lipids                  | NASH_CTRL        |          | NASH_NAFL        |          | NAFL_CTRL        |          |
|-------------------------|------------------|----------|------------------|----------|------------------|----------|
|                         | AUROC (95% CI)   | P value  | AUROC (95% CI)   | P value  | AUROC (95% CI)   | P value  |
| <b>AA/EPA</b>           | 0.53 (0.49-0.79) | 0.735    | 0.67 (0.51-0.88) | 0.139    | 0.72 (0.54-0.91) | 0.045*   |
| <b>CAR 10:0</b>         | 0.57 (0.51-0.82) | 0.607    | 0.53 (0.49-0.82) | 0.851    | 0.67 (0.51-0.88) | 0.191    |
| <b>CAR 12:0</b>         | 0.54 (0.51-0.80) | 0.714    | 0.57 (0.50-0.80) | 0.558    | 0.58 (0.50-0.78) | 0.480    |
| <b>CAR 14:0</b>         | 0.57 (0.50-0.79) | 0.537    | 0.58 (0.50-0.80) | 0.601    | 0.55 (0.50-0.79) | 0.679    |
| <b>CAR 16:0</b>         | 0.51 (0.50-0.76) | 0.849    | 0.58 (0.51-0.83) | 0.516    | 0.58 (0.50-0.85) | 0.564    |
| <b>CAR 18:0</b>         | 0.66 (0.51-0.86) | 0.129    | 0.55 (0.50-0.80) | 0.747    | 0.68 (0.52-0.92) | 0.133    |
| <b>CAR 18:1</b>         | 0.63 (0.52-0.85) | 0.247    | 0.55 (0.50-0.79) | 0.652    | 0.53 (0.51-0.80) | 0.831    |
| <b>CAR 18:2</b>         | 0.59 (0.51-0.80) | 0.399    | 0.49 (0.50-0.83) | 1.000    | 0.63 (0.51-0.90) | 0.269    |
| <b>CAR 2:0</b>          | 0.50 (0.50-0.80) | 0.963    | 0.58 (0.50-0.81) | 0.512    | 0.59 (0.50-0.83) | 0.459    |
| <b>CAR 3:0</b>          | 0.79 (0.61-0.94) | 0.002**  | 0.69 (0.51-0.92) | 0.126    | 0.54 (0.51-0.84) | 0.846    |
| <b>CAR 4:0</b>          | 0.72 (0.53-0.91) | 0.031*   | 0.65 (0.51-0.88) | 0.238    | 0.58 (0.50-0.80) | 0.584    |
| <b>CAR 5:0</b>          | 0.73 (0.54-0.89) | 0.029*   | 0.61 (0.50-0.87) | 0.339    | 0.59 (0.51-0.82) | 0.431    |
| <b>CAR 6:0</b>          | 0.55 (0.51-0.79) | 0.640    | 0.50 (0.50-0.78) | 1.000    | 0.56 (0.50-0.81) | 0.601    |
| <b>CAR 8:0</b>          | 0.52 (0.50-0.78) | 0.928    | 0.55 (0.50-0.79) | 0.648    | 0.66 (0.51-0.86) | 0.238    |
| <b>Cer(d18:1/16:0)</b>  | 0.76 (0.56-0.91) | 0.006**  | 0.77 (0.54-0.94) | 0.009**  | 0.54 (0.50-0.78) | 0.828    |
| <b>Cer(d18:1/18:0)</b>  | 0.76 (0.54-0.92) | 0.007**  | 0.69 (0.52-0.91) | 0.078    | 0.63 (0.51-0.84) | 0.261    |
| <b>Cer(d18:1/24:0)</b>  | 0.59 (0.51-0.79) | 0.383    | 0.65 (0.50-0.88) | 0.224    | 0.55 (0.50-0.78) | 0.711    |
| <b>Cer(d18:1/24:1)</b>  | 0.63 (0.50-0.82) | 0.256    | 0.66 (0.51-0.89) | 0.184    | 0.51 (0.50-0.75) | 0.867    |
| <b>DNL index</b>        | 0.76 (0.57-0.93) | 0.010*   | 0.58 (0.50-0.83) | 0.598    | 0.89 (0.71-1)    | <0.001** |
| <b>EFA</b>              | 0.68 (0.51-0.89) | <0.001** | 0.80 (0.57-0.96) | 0.239    | 0.70 (0.52-0.95) | 0.139    |
| <b>EPA/DGLA</b>         | 0.67 (0.51-0.90) | 0.066    | 0.51 (0.48-0.78) | 0.002**  | 0.71 (0.52-0.89) | 0.105    |
| <b>Elongation index</b> | 0.81 (0.63-0.96) | 0.132    | 0.64 (0.51-0.87) | 1.000    | 0.67 (0.51-0.86) | 0.059    |
| <b>FA 12:0</b>          | 0.92 (0.80-1)    | <0.001** | 0.75 (0.50-0.92) | 0.035*   | 0.59 (0.49-0.83) | 0.468    |
| <b>FA 14:0</b>          | 0.87 (0.72-0.97) | <0.001** | 0.82 (0.59-0.96) | 0.001**  | 0.51 (0.50-0.79) | 0.789    |
| <b>FA 15:0</b>          | 0.72 (0.55-0.89) | 0.016*   | 0.79 (0.57-0.95) | 0.005**  | 0.55 (0.50-0.84) | 0.660    |
| <b>FA 16:0</b>          | 0.79 (0.58-0.96) | 0.003**  | 0.72 (0.51-0.89) | 0.049*   | 0.61 (0.51-0.85) | 0.372    |
| <b>FA 16:1</b>          | 0.81 (0.61-0.96) | 0.001**  | 0.75 (0.55-0.92) | 0.019*   | 0.59 (0.49-0.83) | 0.408    |
| <b>FA 17:0</b>          | 0.71 (0.52-0.88) | 0.035*   | 0.81 (0.61-0.94) | 0.001**  | 0.58 (0.50-0.82) | 0.536    |
| <b>FA 18:0</b>          | 0.74 (0.53-0.92) | 0.022*   | 0.79 (0.58-0.94) | 0.003**  | 0.55 (0.50-0.80) | 0.694    |
| <b>FA 18:1</b>          | 0.79 (0.61-0.93) | 0.002**  | 0.71 (0.52-0.91) | 0.065    | 0.60 (0.51-0.84) | 0.396    |
| <b>FA 18:2</b>          | 0.69 (0.51-0.89) | 0.074    | 0.80 (0.57-0.96) | 0.001**  | 0.70 (0.52-0.95) | 0.105    |
| <b>FA 18:3 n3</b>       | 0.83 (0.66-0.97) | <0.001** | 0.85 (0.67-1)    | <0.001** | 0.53 (0.48-0.78) | 0.737    |
| <b>FA 18:3 n6</b>       | 0.65 (0.50-0.86) | 0.190    | 0.68 (0.50-0.90) | 0.157    | 0.51 (0.50-0.78) | 0.912    |

|                             |                  |          |                  |          |                  |        |
|-----------------------------|------------------|----------|------------------|----------|------------------|--------|
| <b>FA 20:0</b>              | 0.62 (0.46-0.83) | 0.495    | 0.67 (0.49-0.86) | 0.137    | 0.58 (0.48-0.79) | 0.534  |
| <b>FA 20:1</b>              | 0.83 (0.67-0.96) | <0.001** | 0.73 (0.53-0.93) | 0.061    | 0.57 (0.50-0.83) | 0.550  |
| <b>FA 20:3 n6</b>           | 0.74 (0.55-0.91) | 0.020*   | 0.67 (0.51-0.88) | 0.158    | 0.57 (0.49-0.80) | 0.582  |
| <b>FA 20:4 n6</b>           | 0.53 (0.49-0.76) | 0.889    | 0.53 (0.48-0.78) | 0.896    | 0.52 (0.49-0.81) | 0.913  |
| <b>FA 20:5 n3</b>           | 0.57 (0.49-0.80) | 0.626    | 0.70 (0.53-0.91) | 0.079    | 0.66 (0.52-0.86) | 0.109  |
| <b>FA 22:0</b>              | 0.49 (0.48-0.73) | 1.000    | 0.60 (0.47-0.82) | 0.558    | 0.59 (0.49-0.82) | 0.456  |
| <b>FA 22:6 n3</b>           | 0.64 (0.51-0.86) | 0.208    | 0.72 (0.52-0.90) | 0.062    | 0.6 (0.50-0.81)  | 0.403  |
| <b>FA 24:0</b>              | 0.52 (0.50-0.72) | 0.961    | 0.60 (0.48-0.83) | 0.471    | 0.59 (0.48-0.81) | 0.441  |
| <b>FA 24:1</b>              | 0.68 (0.52-0.88) | 0.067    | 0.53 (0.49-0.80) | 0.793    | 0.67 (0.50-0.89) | 0.095  |
| <b>LA/GLA</b>               | 0.68 (0.52-0.91) | 0.092    | 0.78 (0.56-0.95) | 0.006**  | 0.71 (0.53-0.96) | 0.079  |
| <b>MUFA</b>                 | 0.78 (0.61-0.93) | 0.002**  | 0.70 (0.52-0.90) | 0.062    | 0.61 (0.51-0.85) | 0.393  |
| <b>NEFA</b>                 | 0.78 (0.60-0.93) | 0.004**  | 0.70 (0.52-0.89) | 0.078    | 0.58 (0.50-0.85) | 0.507  |
| <b>PUFA</b>                 | 0.68 (0.51-0.89) | 0.083    | 0.80 (0.57-0.97) | 0.001**  | 0.65 (0.51-0.92) | 0.277  |
| <b>Ratio Cer(16:0/24:0)</b> | 0.62 (0.51-0.84) | 0.340    | 0.64 (0.51-0.87) | 0.268    | 0.50 (0.50-0.82) | 1.000  |
| <b>Ratio Cer(18:0/24:0)</b> | 0.77 (0.57-0.93) | 0.004**  | 0.63 (0.50-0.85) | 0.316    | 0.66 (0.50-0.87) | 0.153  |
| <b>Ratio Cer(18:1/24:0)</b> | 0.54 (0.51-0.76) | 0.697    | 0.50 (0.50-0.82) | 1.000    | 0.52 (0.50-0.77) | 0.868  |
| <b>SFA</b>                  | 0.79 (0.59-0.95) | 0.001**  | 0.75 (0.54-0.91) | 0.024*   | 0.59 (0.50-0.84) | 0.436  |
| <b>TFA</b>                  | 0.75 (0.57-0.92) | 0.008**  | 0.75 (0.56-0.92) | 0.016*   | 0.51 (0.50-0.81) | 0.914  |
| <b>Total n3 FA</b>          | 0.65 (0.51-0.87) | 0.128    | 0.77 (0.58-0.93) | 0.010*   | 0.60 (0.50-0.80) | 0.422  |
| <b>Total n6 FA</b>          | 0.62 (0.50-0.83) | 0.268    | 0.62 (0.50-0.86) | 0.351    | 0.53 (0.50-0.80) | 0.780  |
| <b>Δ5-desaturase index</b>  | 0.75 (0.55-0.94) | 0.015*   | 0.85 (0.66-1)    | <0.001** | 0.75 (0.56-0.97) | 0.033* |
| <b>Δ6-desaturase index</b>  | 0.62 (0.50-0.86) | 0.225    | 0.77 (0.56-0.95) | 0.010*   | 0.73 (0.54-0.97) | 0.069  |
| <b>Δ9-desaturase index</b>  | 0.71 (0.52-0.91) | 0.078    | 0.68 (0.51-0.89) | 0.144    | 0.67 (0.51-0.85) | 0.135  |

-The table includes for each pair of groups compared and for each lipid. the AUC value (95% CI). as well as the corresponding one P value of the difference from the dummy model

- \*: p value <0.05. \*\*: p value <0.01. statistically significant
